# Supplementary material
Source: publisher figshare collection journal article supplement (https://future-science-group.figshare.com/ndownloader/files/18028235)
Supplement: Supplementary file 1 [file 18028235]

## Sheet: 1 pool
Enriched fragment length and effective detection length in Pool 1
Fragments	Dimensions	Bulks(bp)								Valid enriched fragment length(bp)
		1	2	3	4	5	6	7	8
Os06g10350-1	X	355	356	356	355	355	355	355	355	121765
	Y	355	356	355	355	355	355	356	356
	Z	355	355	355	355	355	355	355	355
Os06g10350-3	X	131	168	124	127	312	119	123	123	48849
	Y	279	309	282	284	136	138	137	131
	Z	283	267	281	275	284	297	283	294
Os07g11440-1	X	444	446	448	449	465	447	446	442	151265
	Y	447	442	441	447	450	449	441	447
	Z	447	442	438	437	441	447	441	439
Os07g11440-2	X	460	471	464	463	439	504	498	446	146356
	Y	439	324	447	439	445	489	497	481
	Z	456	454	461	439	451	456	439	116
Os07g11440-3	X	455	455	455	456	454	458	99	166	138383
	Y	459	461	468	457	459	454	457	455
	Z	462	457	456	456	455	449	460	459
Os07g32620-1	X	106	108	103	108	100	99	102	100	35259
	Y	151	160	151	160	101	103	104	104
	Z	163	165	158	145	151	145	134	110
Os07g32620-2	X	0	0	0	0	0	0	0	0	0
	Y	98	0	0	101	98	0	0	0
	Z	113	121	105	103	103	102	89	0
OsOSC7-6	X	446	448	461	454	474	450	448	453	149758
	Y	442	438	441	440	454	458	454	453
	Z	441	440	439	424	433	443	439	425
OsOSC7-7	X	420	420	419	420	420	421	99	100	117987
	Y	401	393	402	412	420	421	409	419
	Z	404	385	387	386	387	367	380	233
OsOSC7-8	X	481	482	484	481	498	483	487	481	140616
	Y	420	444	417	416	486	481	473	484
	Z	411	387	410	402	416	427	423	444
OsOSC11-4	X	396	399	404	402	424	395	402	399	136630
	Y	411	410	408	411	399	411	396	399
	Z	411	408	399	394	399	415	404	99
OsOSC11-5	X	435	435	435	436	435	437	0	99	114654
	Y	400	392	411	423	434	434	423	432
	Z	418	392	398	384	391	376	379	239
OsOSC11-6	X	467	470	470	465	485	475	469	473	137529
	Y	409	458	406	405	462	467	467	470
	Z	405	379	397	395	405	423	412	458
OsOSC11-7	X	414	415	416	416	431	413	418	415	142577
	Y	429	429	425	429	416	415	415	412
	Z	431	426	421	415	421	431	425	148
OsOSC11-8	X	421	420	418	420	417	420	67	99	118363
	Y	406	394	402	414	421	420	412	419
	Z	410	391	392	391	392	381	387	172
OsOSC11-11	X	442	444	449	443	469	445	448	445	147518
	Y	433	435	433	432	445	443	441	439
	Z	430	433	432	424	426	439	430	420
OsOSC11-9	X	475	467	473	474	493	475	476	465	139188
	Y	415	449	412	407	474	475	469	472
	Z	411	390	398	402	411	420	415	445
OsOSC11-10	X	415	416	413	414	407	413	62	99	110684
	Y	388	372	391	405	418	417	405	416
	Z	400	371	372	371	368	330	358	211
OsCAP1-1	X	127	133	130	132	107	123	0	53	368,34
	Y	152	162	147	139	132	132	134	132
	Z	152	160	152	139	152	152	141	120
OsCAP1-2	X	500	500	503	502	512	500	500	499	151179
	Y	455	493	443	441	504	500	500	494
	Z	443	434	441	434	441	451	445	482
OsCAP1-3	X	466	469	476	470	491	472	473	468	154623
	Y	453	452	449	452	472	470	468	465
	Z	452	456	451	448	449	453	451	446
OsCAP1-4	X	752	751	752	753	758	755	99	115	207747
	Y	701	736	694	694	752	752	752	753
	Z	694	672	686	684	694	706	701	733
OsOSC3-1	X	99	105	99	108	90	72	99	53	32613
	Y	108	126	125	123	99	99	99	99
	Z	123	135	127	123	127	126	108	56
OsOSC3-2	X	0	476	476	477	494	475	482	478	121680
	Y	423	462	424	424	475	475	476	475
	Z	415	398	407	403	423	430	424	452
Os06g03610-P2	X	0	59	0	0	0	0	0	0	0
	Y	0	0	0	0	0	0	0	0
	Z	0	33	0	0	0	0	0	0
Os06g03610-1	X	0	0	0	0	0	0	0	0	0
	Y	92	99	99	99	0	33	79	81
	Z	88	102	99	99	99	97	68	0
Os06g03610-2	X	537	575	531	535	439	525	537	506	142579
	Y	461	121	471	467	495	534	535	531
	Z	475	475	475	471	474	474	463	99
Os06g03610-3	X	91	99	98	99	58	135	0	99	28105
	Y	1164	1189	1170	1170	103	122	148	100
	Z	1178	1189	1183	1154	1176	1171	1158	1130
Os06g03610-4	X	216	372	207	226	194	361	199	207	0
	Y	0	0	0	0	200	520	532	220
	Z	0	0	0	0	0	0	0	0
Os06g03610-5	X	118	265	122	167	99	158	0	148	0
	Y	0	0	0	0	180	266	295	256
	Z	0	0	0	0	0	0	0	0
OsUGT-1	X	0	0	0	0	0	0	0	0	0
	Y	0	80	58	0	0	0	0	0
	Z	0	96	93	85	89	85	0	0
OsUGT-2	X	0	0	0	0	0	0	0	0	0
	Y	0	0	0	0	0	0	0	0
	Z	0	0	0	0	0	0	0	0
OsUGT-4	X	0	0	0	0	0	0	0	0	0
	Y	0	0	0	0	0	0	0	0
	Z	0	0	0	0	0	0	0	0
Os06g10350-2	X	0	0	0	0	0	0	0	0	0
	Y	0	0	0	0	0	0	0	0
	Z	0	0	0	0	0	0	0	0
OsCAP1-5	X	0	0	0	0	0	0	0	0	0
	Y	0	0	0	0	0	0	0	0
	Z	0	0	0	0	0	0	0	0
OsUGT-3	X	203	222	207	208	166	203	0	99	58947
	Y	291	293	292	270	203	208	229	215
	Z	328	329	315	276	295	296	291	230
Sum										3031688

## Sheet: 2 pool
Table S7. Enriched fragment length and effective detection length in Pool 1
Fragments	Dimensions	Bulks(bp)								Valid enriched fragment length(bp)
		1	2	3	4	5	6	7	8
Os06g10350-1	X	356	356	355	355	356	356	355	356	121825
	Y	356	356	356	355	356	356	355	355
	Z	356	355	356	355	356	355	355	355
Os06g10350-3	X	146	138	284	124	137	137	293	118	45923
	Y	281	123	284	137	289	284	283	134
	Z	123	147	130	118	192	122	281	290
Os07g11440-1	X	449	448	447	450	448	451	451	446	153229
	Y	456	448	447	450	447	444	446	429
	Z	462	447	447	447	448	457	448	454
Os07g11440-2	X	447	482	473	441	486	514	515	439	157359
	Y	491	512	507	439	446	496	499	463
	Z	445	500	504	481	475	479	467	467
Os07g11440-3	X	458	449	454	460	461	459	456	460	155654
	Y	459	459	459	457	445	456	457	461
	Z	456	457	459	457	456	460	459	459
Os07g32620-1	X	108	111	114	100	108	103	108	99	35511
	Y	108	99	108	103	110	114	111	114
	Z	103	111	109	99	111	107	111	103
Os07g32620-2	X	0	99	99	0	0	111	104	0	6078
	Y	97	0	104	0	0	105	102	99
	Z	0	100	101	0	84	98	0	0
OsOSC7-6	X	461	457	455	458	461	453	448	446	154914
	Y	458	448	455	458	458	456	448	437
	Z	461	455	458	453	453	456	450	458
OsOSC7-7	X	415	403	404	420	419	419	405	420	138507
	Y	414	415	406	419	382	404	409	416
	Z	430	411	415	429	412	419	412	420
OsOSC7-8	X	484	484	480	489	488	484	487	487	164868
	Y	488	487	484	494	487	478	471	480
	Z	494	481	482	486	484	484	485	487
OsOSC11-4	X	405	405	398	408	405	405	405	400	136997
	Y	410	408	399	410	399	399	400	372
	Z	411	400	400	395	400	409	402	411
OsOSC11-5	X	424	409	411	436	434	423	411	437	139814
	Y	432	435	415	422	363	411	412	431
	Z	442	421	423	440	424	436	434	433
OsOSC11-6	X	467	472	465	463	467	469	470	476	159557
	Y	470	476	470	477	462	467	465	470
	Z	475	469	468	473	468	475	461	468
OsOSC11-7	X	416	416	415	418	420	418	414	415	142099
	Y	418	418	415	421	416	414	415	386
	Z	426	413	415	412	416	424	414	420
OsOSC11-8	X	416	407	406	424	422	419	411	417	139377
	Y	414	416	411	416	387	407	406	414
	Z	423	413	414	424	412	420	416	421
OsOSC11-11	X	446	450	443	445	447	448	448	445	152423
	Y	448	450	450	451	446	441	445	424
	Z	454	445	448	445	449	449	441	450
OsOSC11-9	X	471	477	467	472	477	474	476	472	160801
	Y	477	481	469	475	466	472	462	473
	Z	477	474	469	476	474	474	469	475
OsOSC11-10	X	405	388	391	421	413	402	392	416	129343
	Y	407	406	398	409	265	391	399	407
	Z	422	400	405	416	401	413	407	416
OsCAP1-1	X	134	131	138	109	134	133	132	122	43199
	Y	138	123	138	127	131	138	138	138
	Z	127	139	132	123	138	134	133	132
OsCAP1-2	X	499	504	499	498	497	502	503	499	170868
	Y	504	499	502	505	499	503	497	499
	Z	504	498	504	500	502	503	494	499
OsCAP1-3	X	476	472	470	476	473	469	472	472	160635
	Y	476	468	470	473	472	465	467	452
	Z	479	470	470	466	470	471	471	472
OsCAP1-4	X	751	755	752	755	752	751	753	751	257736
	Y	753	753	752	752	751	752	751	751
	Z	755	752	752	753	751	753	751	750
OSC3-1	X	107	106	109	79	106	99	108	93	32935
	Y	106	90	104	99	108	108	106	107
	Z	99	108	105	90	108	99	106	99
OSC3-2	X	473	478	475	486	482	478	479	477	162998
	Y	478	478	478	482	476	475	473	473
	Z	486	475	477	479	479	475	475	477
03610-P2	X	94	0	91	0	88	9	0	0	3255
	Y	57	0	47	0	0	99	72	99
	Z	0	96	45	0	69	58	29	24
03610-1	X	18	91	95	0	95	93	93	0	12309
	Y	92	0	91	86	91	96	95	95
	Z	0	95	94	0	92	32	88	19
03610-2	X	527	541	557	531	541	531	534	506	179748
	Y	542	525	536	526	512	551	531	539
	Z	505	538	531	530	542	539	535	533
03610-3	X	800	815	812	127	807	646	814	618	153595
	Y	805	635	801	641	170	807	806	783
	Z	396	807	809	376	203	803	799	632
03610-4	X	0	0	0	356	0	152	0	26	2488
	Y	0	136	0	142	534	0	0	0
	Z	396	0	0	60	558	0	0	148
03610-5	X	299	269	303	144	299	275	251	144	63345
	Y	307	144	305	146	186	310	302	307
	Z	268	315	303	0	310	301	291	258
UGT-1	X	0	0	0	0	0	0	0	0	0
	Y	0	0	0	0	0	0	0	0
	Z	0	0	0	0	0	0	0	0
UGT-2	X	0	0	0	0	0	0	0	0	0
	Y	0	0	0	0	0	0	0	0
	Z	0	0	0	0	0	0	0	0
UGT-3	X	242	226	242	190	241	228	222	205	72034
	Y	250	197	252	201	211	250	243	249
	Z	208	254	231	201	231	230	225	209
UGT-4	X	0	0	0	0	0	0	0	0	0
	Y	0	0	0	0	0	0	0	0
	Z	0	0	0	0	0	0	0	0
06g10350-2	X	0	0	0	0	0	0	0	0	0
	Y	0	0	0	0	0	0	0	0
	Z	0	0	0	0	0	0	0	0
OsCAP1-5	X	0	0	0	0	0	0	0	0	0
	Y	0	0	0	0	0	0	0	0
	Z	0	0	0	0	0	0	0	0
Sum										3609424
